# Supplementary material for: Identification of chlorpyrifos-degrading microorganisms in farmland soils via cultivation-independent and -dependent approaches
Source: Royal Society of Chemistry journal article supplement (doi:10.1039/d2em00095d), 2022-01-01
Supplement: d2em00095d1.pdf [file d2em00095d1.pdf]

## Electronic Supporting Information

### Identification of chlorpyrifos-degrading microorganisms in farmland soils via cultivation-independent and -dependent approaches

Luning Lian<sup>1,2,3</sup>, Yi Xing<sup>1,2,3\*</sup>, Nana Zhang<sup>1,2,3</sup>, Bo Jiang<sup>1,2,3,4\*</sup>

1. School of Energy and Environmental Engineering, University of Science & Technology Beijing, Beijing, 100083, PR China

2. Beijing Key Laboratory of Resource-oriented Treatment of Industrial Pollutants, University of Science & Technology Beijing, Beijing, 100083, PR China

3. National Environmental and Energy Science and Technology International Cooperation Base, University of Science & Technology Beijing, Beijing, 100083, PR China

4. National Engineering Laboratory for Site Remediation Technologies, Beijing, 100015, PR China

\*Corresponding author(s):

Dr. Bo Jiang

School of Energy and Environmental Engineering, University of Science & Technology Beijing, Beijing, 100083, PR China

Tel: +8613501144672

Email: [jiangbo\\_seee@ustb.edu.cn](mailto:jiangbo_seee@ustb.edu.cn)

Pro. Yi Xing

School of Energy and Environmental Engineering, University of Science & Technology Beijing, Beijing, 100083, PR China

Tel: +8613910550761

Email: [xingyi@ustb.edu.cn](mailto:xingyi@ustb.edu.cn)

### **1. MNPs synthesis**

The 1 mL of FeCl<sub>2</sub> (1.0 M) was mixed with 2 mL of FeCl<sub>3</sub> (2.0 M). Then, 25 mL of NaOH (2.0 M) was added dropwise to the mixture. After 30 min of continuous shock, the black Fe<sub>3</sub>O<sub>4</sub> composite MNPs were retrieved using a magnet and then washed with 30 mL of deionized water several times until the pH 7.0. The concentration of synthetic MNPs was 9.1 g/L.

### **2. Nucleic acid extraction**

DNA was extracted via a Power Soil DNA extraction kit (MOBIO, USA) in accordance with the manufacturer's instruction. To determine the microbial community structure, V3 and V4 regions of 16S rDNA were amplified with a primer pair of 27F (5'-AGAGTTTGATCCTGGCTCAG-3) and 1492R (5'-TACCTTGTTACGACTT-3'). The PCR procedure was set at: 5 min at 94°C; 30 cycles of 1 min at 94°C, 1 min at 55°C, and 1.5 min at 72°C; followed by 5 min at 72°C. The PCR products were detected via 1% agarose gel electrophoresis and Nanodrop 2000, and purified by EZNA Gel Extraction Kit (Omega, USA). Sequencing libraries were generated using NEBNext®Ultra™DNA Library Prep Kit for Illumina® (New England Biolabs, MA, USA) following manufacturer's instruction. The library was sequenced on an illumina Hiseq 2500 platform and 250 bp paired-end reads were generated.

### **3. The composition of culture medium**

**Enrichment media:** 5 g beef extract, 10 g peptone, 5 g NaCl, 0.5 g NaH<sub>2</sub>PO<sub>4</sub>, and 1.5 g Na<sub>2</sub>HPO<sub>4</sub> in 1L of sterilized water, with CPF concentration 20 mg/L.

**Mineral medium agar plates (MMA)** which was prepared by adding 0.5 g  $\text{KH}_2\text{PO}_4$ , 0.5 g NaCl, 0.1 g  $\text{CaCl}_2$ , 0.2 g  $\text{MgSO}_4 \cdot 7\text{H}_2\text{O}$ , 0.5 g  $\text{FeSO}_4 \cdot 7\text{H}_2\text{O}$ , 0.5 g  $\text{MnSO}_4$ , and 1.5 g  $(\text{NH}_4)_2\text{SO}_4$  in 1 L of sterilized water, and 1.5% (w/v) agar was added.

#### **4. CPF analysis**

The CPF extraction was conducted from soil by solid phase extraction, during each extraction procedure, 0.5 g NaCl, 2 mL acetone, and a certain volume of acetonitrile (3 mL, 2 mL, and 1 mL for the 3 extractions, respectively) were added into the supernatant and sonicated for 10 min. Supernatants from the 3 successive extractions were mixed, and subsequently dried at 30°C by a rotary evaporator. The CPF standards (concentration ranges 5-200 mg/mL) were used to derive the calibration curve (Fig. S2).

The volume was then adjusted to 5 mL with acetonitrile, followed by a membrane filtration (pore size, 0.22  $\mu\text{m}$ ; nylon) into brown vials for analysis. Concentrations of CPF and its metabolites were detected GC-MS (Shimadzu, QP2010SE) with a DB-5MS capillary column (30m length, 0.25mm diameter, 0.25 $\mu\text{m}$  thickness). A total of 5  $\mu\text{L}$  sample was injected in the splitless mode with a 3-min solvent delay time. The carrier gas was  $\text{N}_2$  (99%) at a rate of 36 mL/min, the hydrogen flow rate was 6 mL/min and the air flow rate was 60 mL/min. The GC oven temperature was set at 60°C for 1 min, raised to 200°C at a rate of 25°C/min and maintained at 200°C for 5 min, and finally raised to 300°C at a rate of 30°C/min and maintained at 300°C for 2 min. Electron impact (EI) source and selected ion monitoring (SIM) mode were used to identify the CPF degradation metabolites. The ion source temperature was 230°C

and scanning range was from 45 to 450 atomic mass units (amu). For CPF metabolites, the molecular mass of each metabolite was compared with previous studies and the database of CPF metabolites (National Institute of Standards and Technology, NIST), and the chemical structure of each metabolite was determined by the pattern of fragment ions in the mass spectrum.

**Table S1 The physicochemical properties data of the soil samples**

| <b>Projects</b>      | <b>Concentration</b> |
|----------------------|----------------------|
| pH                   | 7.5                  |
| H <sub>2</sub> O (%) | 16.4                 |
| Humus (g/kg)         | 10.3                 |
| SOM (g/kg)           | 17.7                 |
| TOC (g/kg)           | 10.3                 |
| TN (g/kg)            | 1.12                 |
| Available N (mg/kg)  | 79.3                 |
| TP (g/kg)            | 1.10                 |
| Available P (mg/kg)  | 52.5                 |
| Available K (mg/kg)  | 125                  |

**Table S2 PCR primers used for the amplication of CPF-degrading genes.**

| Target       | Sequence(5'-3')                                                      |
|--------------|----------------------------------------------------------------------|
| <i>opd2</i>  | F:5'-ATGCACGAGCACGTCTTCATCATGA-3'<br>R:5'-TCACTGATAGCCGCCCTGCCGCT-3' |
| <i>opd4</i>  | F:5'-TTGCGCCATCTTGAACATGC<br>R:5'-CAGGCAGTCGCACCCTATGC               |
| <i>opdB</i>  | F:5'-CGTCGTCGGCTGGGCAGGGT-3'<br>R:5'-GCGTGCGGCCTACCTCGTTG-3'         |
| <i>opdC2</i> | F:5-'ATGCGTCTTTTCTCGCTGAGC-3'<br>R:5'-TCAGCGGTCGCTACGGATCGG-3'       |

**Table S3** Microbial taxonomic analysis in different treatments.

| Kingdom  | Phylum           | Class               | Order              | Family                        | Relative Abundance (%) |               |                |                |              |               |               |               |                |                |
|----------|------------------|---------------------|--------------------|-------------------------------|------------------------|---------------|----------------|----------------|--------------|---------------|---------------|---------------|----------------|----------------|
|          |                  |                     |                    |                               | OS_0                   | MMI_CP<br>F_7 | MMI_C<br>PF_21 | MMI_C<br>PF_35 | OS_CPF<br>_7 | OS_CPF<br>_21 | OS_CPF<br>_35 | MFC_<br>CPF_7 | MFC_<br>CPF_21 | MFC_<br>CPF_35 |
| Bacteria | Proteobacteria   | Gammaproteobacteria | Pseudomonadales    | Pseudomonadaceae              | 2                      | 30.14         | 12.25          | 12.29          | 9.01         | 6.02          | 3.53          | 36.9          | 65.47          | 33.23          |
| Bacteria | Proteobacteria   | Betaproteobacteria  | Methylophilales    | Methylophilaceae              | 13.41                  | 3.44          | 0.2            | 0.73           | 2.79         | 0.36          | 0.26          | 0.74          | 0.22           | 0.46           |
| Bacteria | Firmicutes       | Bacilli             | Bacillales         | Bacillales_Incertae Sedis XII | 5.82                   | 3.67          | 6.53           | 6.16           | 4.84         | 6.27          | 0             | 2.05          | 3.38           | 1.71           |
| Bacteria | Proteobacteria   | Alphaproteobacteria | Sphingomonadales   | Sphingomonadaceae             | 4.35                   | 9.4           | 7.84           | 6.36           | 7.2          | 7.82          | 6.97          | 3.86          | 0.76           | 2.21           |
| Bacteria | Proteobacteria   | Betaproteobacteria  | Rhodocyclales      | Rhodocyclaceae                | 3.08                   | 1.42          | 1.57           | 2.14           | 3.64         | 3.15          | 3.7           | 3.13          | 3.45           | 13.05          |
| Bacteria | Gemmatimonadetes | Gemmatimonadetes    | Gemmatimonadales   | Gemmatimonadaceae             | 5.52                   | 4.86          | 5.8            | 5.33           | 7.65         | 8.56          | 5.93          | 2.14          | 0.59           | 0.88           |
| Bacteria | Proteobacteria   | Gammaproteobacteria | Enterobacteriales  | Enterobacteriaceae            | 4.04                   | 2.24          | 4.07           | 3.84           | 3.18         | 3.75          | 0.01          | 1.09          | 1.93           | 1.11           |
| Bacteria | Proteobacteria   | Betaproteobacteria  | Burkholderiales    | Comamonadaceae                | 0.69                   | 1.51          | 0.94           | 2.83           | 1.76         | 0.97          | 2.9           | 2.57          | 0.37           | 3.53           |
| Bacteria | Planctomycetes   | Planctomycetia      | Planctomycetales   | Planctomycetaceae             | 3.89                   | 2.71          | 3.3            | 4.28           | 2.04         | 2.9           | 5.94          | 0.89          | 0.18           | 0.49           |
| Bacteria | Proteobacteria   | Betaproteobacteria  | Neisseriales       | Neisseriaceae                 | 0                      | 0             | 0              | 0.31           | 0.01         | 0             | 0.02          | 18.97         | 0.39           | 18.82          |
| Bacteria | Bacteroidetes    | Sphingobacteriia    | Sphingobacteriales | Chitinophagaceae              | 2.41                   | 2.98          | 3.95           | 2.99           | 3.84         | 3.76          | 1.86          | 1.24          | 0.22           | 0.46           |

|          |                |                                                      |                    |                                    |      |      |      |      |      |      |      |      |      |      |
|----------|----------------|------------------------------------------------------|--------------------|------------------------------------|------|------|------|------|------|------|------|------|------|------|
| Bacteria | Proteobacteria | Gammaproteobacteria Pseudomonadales Moraxellaceae    |                    |                                    | 1.89 | 1.12 | 2.14 | 2.18 | 1.67 | 2.05 | 0.02 | 0.67 | 1.02 | 0.54 |
| Bacteria | Proteobacteria | Gammaproteobacteria Xanthomonadales Xanthomonadaceae |                    |                                    | 2.18 | 2.69 | 3.5  | 2.14 | 2.62 | 1.87 | 1.48 | 0.61 | 0.12 | 0.43 |
| Bacteria | Proteobacteria | Alphaproteobacteria                                  | Rhodospirillales   | Rhodospirillaceae                  | 1.51 | 1.72 | 2.52 | 2.14 | 2.11 | 2.04 | 2.51 | 0.58 | 0.17 | 0.62 |
| Bacteria | Chloroflexi    | Anaerolineae                                         | Anaerolineales     | Anaerolineaceae                    | 0.41 | 0.17 | 0.45 | 0.81 | 0.3  | 0.29 | 2.66 | 0.06 | 0.03 | 0.08 |
| Bacteria | Proteobacteria | Gammaproteobacteria Xanthomonadales Sinobacteraceae  |                    |                                    | 1.86 | 1.19 | 1.77 | 2.43 | 1.75 | 1.55 | 2.36 | 0.34 | 0.1  | 0.23 |
| Bacteria | Proteobacteria | Betaproteobacteria                                   | Burkholderiales    | Oxalobacteraceae                   | 0.24 | 0.59 | 0.29 | 0.62 | 0.39 | 0.43 | 0.3  | 1.39 | 2.06 | 1.32 |
| Bacteria | Proteobacteria | Alphaproteobacteria                                  | Rhizobiales        | Hyphomicrobiaceae                  | 1.32 | 0.91 | 1.25 | 1.22 | 0.81 | 1.15 | 2.04 | 0.63 | 0.18 | 0.27 |
| Bacteria | Nitrospirae    | Nitrospira                                           | Nitrospirales      | Nitrospiraceae                     | 0.78 | 0.36 | 1.02 | 1.54 | 1.29 | 2.3  | 1.31 | 0.34 | 0.15 | 0.23 |
| Bacteria | Proteobacteria | Deltaproteobacteria                                  | Myxococcales       | Kofleriaceae                       | 1.26 | 0.89 | 1.6  | 1.33 | 1.76 | 2.15 | 1.12 | 0.33 | 0.11 | 0.15 |
| Bacteria | Proteobacteria | Betaproteobacteria                                   | Burkholderiales    | Alcaligenaceae                     | 0.11 | 0.07 | 0.15 | 0.35 | 0.12 | 0.1  | 0.31 | 2.05 | 6.89 | 1.2  |
| Bacteria | Proteobacteria | Deltaproteobacteria                                  | Desulfuromonadales | Geobacteraceae                     | 0.01 | 0.16 | 0.06 | 0.92 | 0.04 | 0.03 | 3.45 | 0.01 | 0    | 1.28 |
| Bacteria | Firmicutes     | Clostridia                                           | Clostridiales      | Clostridiales_Incertae_Sedis XVIII | 0    | 0    | 0    | 0.05 | 0    | 0    | 0.2  | 0    | 0    | 0.19 |
| Bacteria | Planctomycetes | Phycisphaerae                                        | Tepidisphaerales   | Tepidisphaeraceae                  | 0.12 | 0.1  | 0.13 | 0.32 | 0.21 | 0.17 | 1.48 | 0.02 | 0    | 0.17 |
| Bacteria | Proteobacteria | Alphaproteobacteria                                  | Caulobacterales    | Caulobacteraceae                   | 0.24 | 0.47 | 0.35 | 0.33 | 0.37 | 0.31 | 0.7  | 0.15 | 0.02 | 0.1  |



|          |                 |                     |                    |                                |      |      |      |      |      |      |      |      |      |      |
|----------|-----------------|---------------------|--------------------|--------------------------------|------|------|------|------|------|------|------|------|------|------|
| Bacteria | Proteobacteria  | Betaproteobacteria  | Burkholderiales    | Burkholderiaceae               | 0.11 | 0.17 | 0.09 | 0.1  | 0.06 | 0.11 | 0.25 | 1.09 | 4.5  | 0.59 |
| Bacteria | Proteobacteria  | Deltaproteobacteria | Bdellovibrionales  | Bdellovibrionaceae             | 0.1  | 2.6  | 0.41 | 0.43 | 1.04 | 0.18 | 0.21 | 0.78 | 0.05 | 0.56 |
| Bacteria | Firmicutes      | Clostridia          | Clostridiales      | Ruminococcaceae                | 0.01 | 0.01 | 0    | 0.23 | 0    | 0    | 0.9  | 0    | 0    | 0.22 |
| Bacteria | Proteobacteria  | Betaproteobacteria  | Burkholderiales    | Burkholderiales_incertae_sedis | 0.46 | 0.21 | 0.34 | 0.51 | 0.98 | 0.89 | 0.36 | 0.45 | 0.67 | 0.15 |
| Bacteria | Proteobacteria  | Deltaproteobacteria | Myxococcales       | Polyangiaceae                  | 0.89 | 0.36 | 0.67 | 0.64 | 0.59 | 0.81 | 0.57 | 0.08 | 0.03 | 0.05 |
| Bacteria | Firmicutes      | Bacilli             | Bacillales         | Bacillaceae 1                  | 0.23 | 0.19 | 0.24 | 0.19 | 0.21 | 0.3  | 0.14 | 0.97 | 0.21 | 1.58 |
| Bacteria | Firmicutes      | Bacilli             | Bacillales         | Paenibacillaceae 1             | 0.03 | 0.93 | 0.19 | 0.32 | 0.17 | 0.3  | 0.01 | 0.52 | 0.81 | 2.73 |
| Bacteria | Proteobacteria  | Deltaproteobacteria | Myxococcales       | Cystobacteraceae               | 0.13 | 0.06 | 0.2  | 0.54 | 0.21 | 0.2  | 1.61 | 0.04 | 0.01 | 0.28 |
| Bacteria | Actinobacteria  | Actinobacteria      | Actinomycetales    | Micrococcaceae                 | 0.14 | 0.03 | 0.09 | 0.05 | 0.08 | 0.06 | 0.04 | 1.09 | 0.04 | 0.04 |
| Bacteria | Chlamydiae      | Chlamydiia          | Chlamydiales       | Parachlamydiaceae              | 0.27 | 0.14 | 0.22 | 0.43 | 0.24 | 0.37 | 0.42 | 0.22 | 0.21 | 0.2  |
| Bacteria | Actinobacteria  | Actinobacteria      | Gaiellales         | Gaiellaceae                    | 0.53 | 0.26 | 0.77 | 0.37 | 0.32 | 0.8  | 0.36 | 0.11 | 0.06 | 0.05 |
| Bacteria | Verrucomicrobia | Verrucomicrobiae    | Verrucomicrobiales | Verrucomicrobiaceae            | 0.36 | 0.69 | 0.53 | 0.37 | 0.15 | 0.16 | 0.5  | 0.08 | 0.01 | 0.08 |
| Bacteria | Proteobacteria  | Deltaproteobacteria | Desulfuromonadales | Desulfuromonadaceae            | 0    | 0    | 0    | 0.09 | 0    | 0    | 0.69 | 0    | 0    | 0.3  |
| Bacteria | Verrucomicrobia | Opitutae            | Opitutales         | Opitutaceae                    | 0.22 | 0.09 | 0.14 | 0.27 | 0.28 | 0.3  | 0.42 | 0.09 | 0.06 | 0.13 |

|          |                |                     |                 |                            |      |      |      |      |      |      |      |      |      |      |
|----------|----------------|---------------------|-----------------|----------------------------|------|------|------|------|------|------|------|------|------|------|
| Bacteria | Proteobacteria | Gammaproteobacteria | Legionellales   | Coxiellaceae               | 0.22 | 0.2  | 0.22 | 0.2  | 0.21 | 0.31 | 0.4  | 0.19 | 0.14 | 0.18 |
| Bacteria | Actinobacteria | Actinobacteria      | Actinomycetales | Nocardiaceae               | 0.02 | 0.01 | 0.04 | 0.01 | 0.03 | 0.03 | 0.08 | 0.06 | 0.03 | 0.03 |
| Bacteria | Firmicutes     | Clostridia          | Clostridiales   | Gracilibacteraceae         | 0    | 0    | 0    | 0.08 | 0    | 0    | 0.28 | 0    | 0    | 0.12 |
| Bacteria | Proteobacteria | Alphaproteobacteria | Rhizobiales     | Rhizobiaceae               | 0.09 | 0.25 | 0.13 | 0.13 | 0.15 | 0.1  | 0.26 | 0.82 | 0.64 | 0.14 |
| Bacteria | Firmicutes     | Negativicutes       | Selenomonadales | Veillonellaceae            | 0    | 0.01 | 0    | 0.06 | 0    | 0    | 0.05 | 0    | 0    | 0.06 |
| Bacteria | Proteobacteria | Alphaproteobacteria | Rhizobiales     | Rhizobiales_incertae_sedis | 0.34 | 0.19 | 0.2  | 0.26 | 0.26 | 0.21 | 0.27 | 0.11 | 0.03 | 0.05 |
| Bacteria | Actinobacteria | Actinobacteria      | Actinomycetales | Nocardioidaceae            | 0.26 | 0.16 | 0.55 | 0.12 | 0.15 | 0.2  | 0.05 | 0.09 | 0.09 | 0.03 |
| Bacteria | Proteobacteria | Deltaproteobacteria | Myxococcales    | Labilitrichaceae           | 0.21 | 0.13 | 0.49 | 0.32 | 0.46 | 0.54 | 0.1  | 0.1  | 0.03 | 0.01 |
| Bacteria | Bacteroidetes  | Cytophagia          | Cytophagales    | Cytophagaceae              | 0.19 | 0.26 | 0.43 | 0.24 | 0.2  | 0.17 | 0.14 | 0.07 | 0.03 | 0.06 |

---

**Table S4** Taxonomic information for the OTUs in the MFC\_CPF treatment based on 16S rRNA gene sequences.

| OTU ID | Kingdom  | Phylum           | Class               | Order             | Family                        | Genus                   |
|--------|----------|------------------|---------------------|-------------------|-------------------------------|-------------------------|
| OTU0   | Bacteria | Proteobacteria   | Betaproteobacteria  | Methylophilales   | Methylophilaceae              | <i>Methylobacillus</i>  |
| OTU1   | Bacteria | Proteobacteria   | Gammaproteobacteria | Enterobacteriales | Enterobacteriaceae            | <i>Citrobacter</i>      |
| OTU3   | Bacteria | Proteobacteria   | Gammaproteobacteria | Pseudomonadales   | Pseudomonadaceae              | <i>Pseudomonas</i>      |
| OTU4   | Bacteria | Firmicutes       | Bacilli             | Bacillales        | Bacillales_Incertae Sedis XII | <i>Exiguobacterium</i>  |
| OTU8   | Bacteria | Proteobacteria   | Betaproteobacteria  | Neisseriales      | Neisseriaceae                 | <i>Vogesella</i>        |
| OTU10  | Bacteria | Actinobacteria   | Actinobacteria      | Actinomycetales   | Micrococcaceae                | <i>Arthrobacter</i>     |
| OTU11  | Bacteria | Proteobacteria   | Gammaproteobacteria | Pseudomonadales   | Moraxellaceae                 | <i>Acinetobacter</i>    |
| OTU14  | Bacteria | Proteobacteria   | Alphaproteobacteria | Sphingomonadales  | Sphingomonadaceae             | <i>Sphingomonas</i>     |
| OTU15  | Bacteria | Proteobacteria   | Betaproteobacteria  | Rhodocyclales     | Rhodocyclaceae                | <i>Azoarcus</i>         |
| OTU17  | Bacteria | Actinobacteria   | Actinobacteria      | Actinomycetales   | Nocardiaceae                  | <i>Rhodococcus</i>      |
| OTU20  | Bacteria | Proteobacteria   | Betaproteobacteria  | Burkholderiales   | Alcaligenaceae                | <i>Azohydromonas</i>    |
| OTU21  | Bacteria | Proteobacteria   | Betaproteobacteria  | Burkholderiales   | Comamonadaceae                | <i>Ramlibacter</i>      |
| OTU22  | Bacteria | Proteobacteria   | Alphaproteobacteria | Rhizobiales       | Hyphomicrobiaceae             | <i>Devosia</i>          |
| OTU26  | Bacteria | Proteobacteria   | Alphaproteobacteria | Caulobacterales   | Caulobacteraceae              | <i>Phenylobacterium</i> |
| OTU31  | Bacteria | Gemmatimonadetes | Gemmatimonadetes    | Gemmatimonadales  | Gemmatimonadaceae             | <i>Gemmatimonas</i>     |
| OTU33  | Bacteria | Firmicutes       | Bacilli             | Bacillales        | Bacillaceae 1                 | <i>Bacillus</i>         |
| OTU34  | Bacteria | Nitrospirae      | Nitrospira          | Nitrospirales     | Nitrospiraceae                | <i>Nitrospira</i>       |

|        |          |                |                     |                    |                                    |                         |
|--------|----------|----------------|---------------------|--------------------|------------------------------------|-------------------------|
| OTU39  | Bacteria | Proteobacteria | Gammaproteobacteria | Xanthomonadales    | Sinobacteraceae                    | <i>Povalibacter</i>     |
| OTU40  | Bacteria | Proteobacteria | Deltaproteobacteria | Desulfuromonadales | Geobacteraceae                     | <i>Geobacter</i>        |
| OTU43  | Bacteria | Proteobacteria | Betaproteobacteria  | Burkholderiales    | Burkholderiaceae                   | <i>Cupriavidus</i>      |
| OTU45  | Bacteria | Bacteroidetes  | Sphingobacteriia    | Sphingobacteriales | Chitinophagaceae                   | <i>Flavitalea</i>       |
| OTU47  | Bacteria | Firmicutes     | Clostridia          | Clostridiales      | Clostridiales_Incertae Sedis XVIII | <i>Symbiobacterium</i>  |
| OTU48  | Bacteria | Proteobacteria | Deltaproteobacteria | Bdellovibrionales  | Bdellovibrionaceae                 | <i>Bdellovibrio</i>     |
| OTU58  | Bacteria | Proteobacteria | Betaproteobacteria  | Burkholderiales    | Oxalobacteraceae                   | <i>Massilia</i>         |
| OTU62  | Bacteria | Firmicutes     | Bacilli             | Bacillales         | Paenibacillaceae 1                 | <i>Paenibacillus</i>    |
| OTU74  | Bacteria | Proteobacteria | Deltaproteobacteria | Myxococcales       | Cystobacteraceae                   | <i>Anaeromyxobacter</i> |
| OTU80  | Bacteria | Proteobacteria | Gammaproteobacteria | Xanthomonadales    | Xanthomonadaceae                   | <i>Lysobacter</i>       |
| OTU88  | Bacteria | Chloroflexi    | Anaerolineae        | Anaerolineales     | Anaerolineaceae                    | <i>unclassified</i>     |
| OTU89  | Bacteria | Proteobacteria | Alphaproteobacteria | Rhizobiales        | Rhizobiaceae                       | <i>Bosea</i>            |
| OTU96  | Bacteria | Planctomycetes | Phycisphaerae       | Tepidisphaerales   | Tepidisphaeraceae                  | <i>Tepidisphaera</i>    |
| OTU108 | Bacteria | Proteobacteria | Alphaproteobacteria | Rhodospirillales   | Rhodospirillaceae                  | <i>Skermanella</i>      |
| OTU109 | Bacteria | Proteobacteria | Deltaproteobacteria | Desulfuromonadales | Desulfuromonadaceae                | <i>Desulfuromonas</i>   |
| OTU136 | Bacteria | Actinobacteria | Actinobacteria      | Actinomycetales    | Nocardioideaceae                   | <i>Nocardioides</i>     |
| OTU171 | Bacteria | Proteobacteria | Betaproteobacteria  | Burkholderiales    | Burkholderiales_incertae_sedis     | <i>unclassified</i>     |
| OTU176 | Bacteria | Firmicutes     | Clostridia          | Clostridiales      | Ruminococcaceae                    | <i>Clostridium III</i>  |
| OTU186 | Bacteria | Proteobacteria | Deltaproteobacteria | Myxococcales       | Kofleriaceae                       | <i>Kofleria</i>         |
| OTU194 | Bacteria | Firmicutes     | Negativicutes       | Selenomonadales    | Veillonellaceae                    | <i>Anaerospora</i>      |

OTU195

Bacteria

Firmicutes

Clostridia

Clostridiales

Gracilibacteraceae

*Gracilibacter*

---

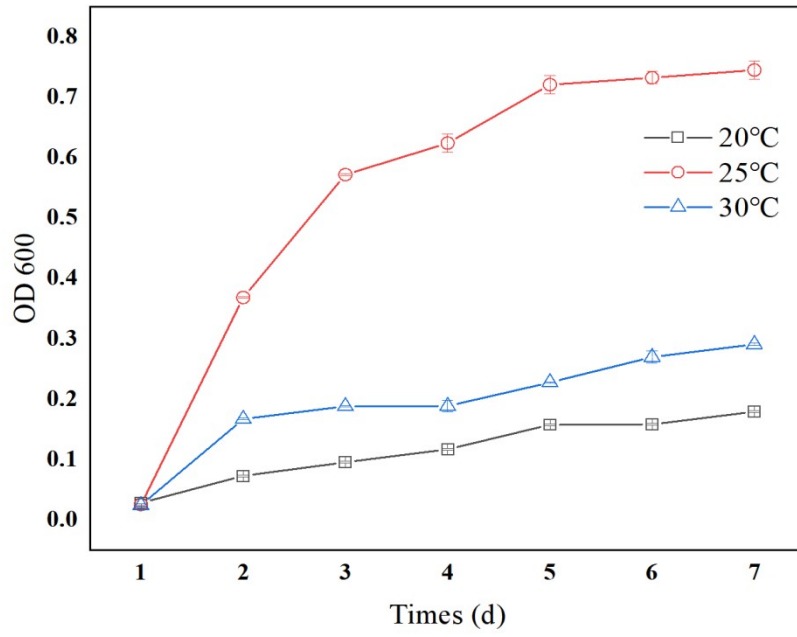

(a)

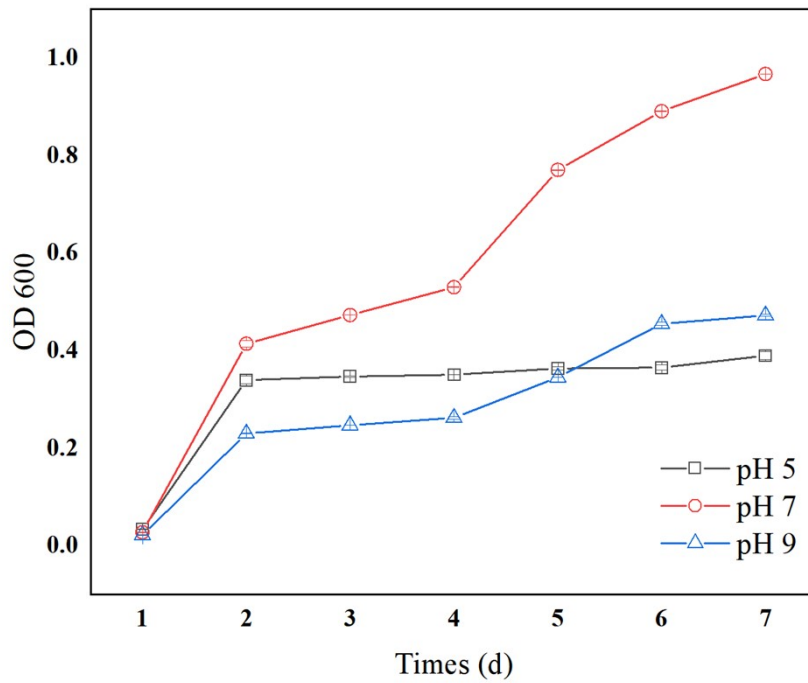

(b)

**Fig.S1** The growth curve of *Alcaligenes* L1 (a) at different temperature, (b) at different pH.

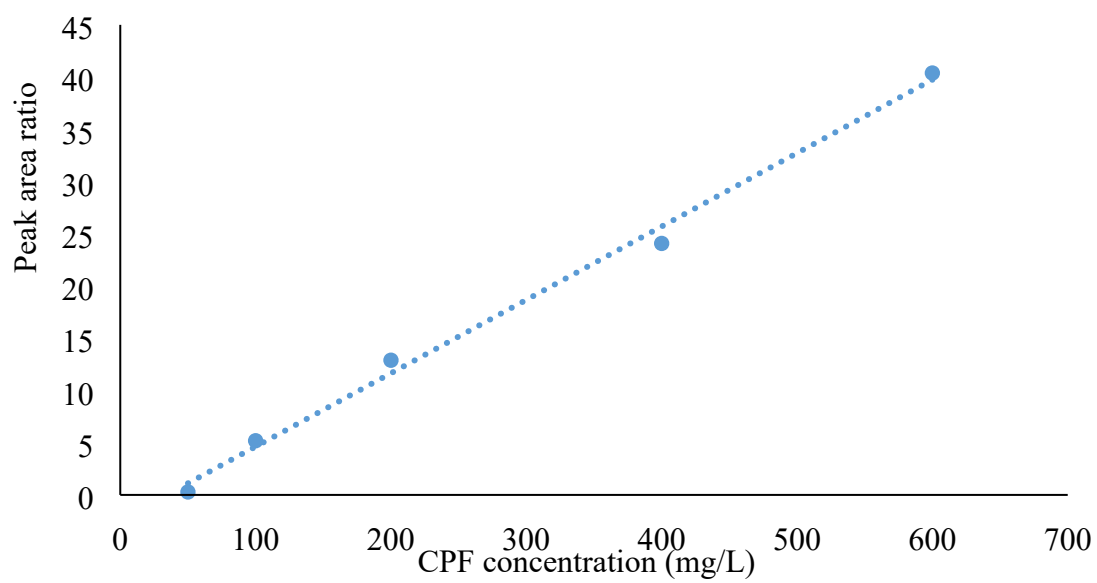

**Fig. S2** Standard curve for CPF via GC-MS.

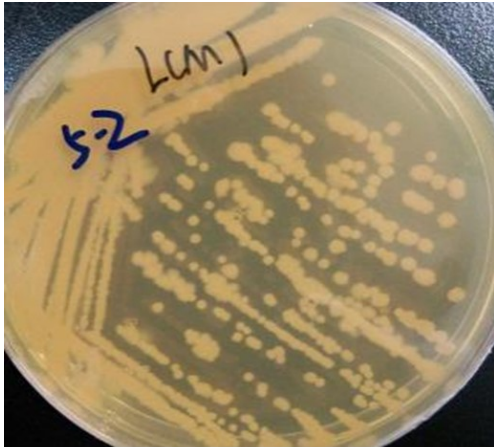

(a)

**Fig.S3** a) *Alcaligenes* L1 on MM-agar plate; b) Degradation rate of *Alcaligenes* L1 under different pH with CPF 100 mg/L (25 °C) c)

Degradation rate of *Alcaligenes* L1 under different temperature with CPF 100 mg/L (pH 7).



(a)

(b)

**Fig.S4** The GC profiles for chlorpyrifos and its metabolites in pure culture (a) and MFC\_CPF treatment (b).
